# Supplementary material for: Regulation of cell growth and migration by miR-96 and miR-183 in a breast cancer model of epithelial-mesenchymal transition
Source: PubMed Central journal article supplement (PMC7217431; doi:10.1371/journal.pone.0233187), 2020-05-12
Supplement: pone.0233187.s010.pdf [file pone.0233187.s010.pdf]

MCF-7M – Time 0

Mock

miR-96 mimic

miR-183 mimic

Negative mimic

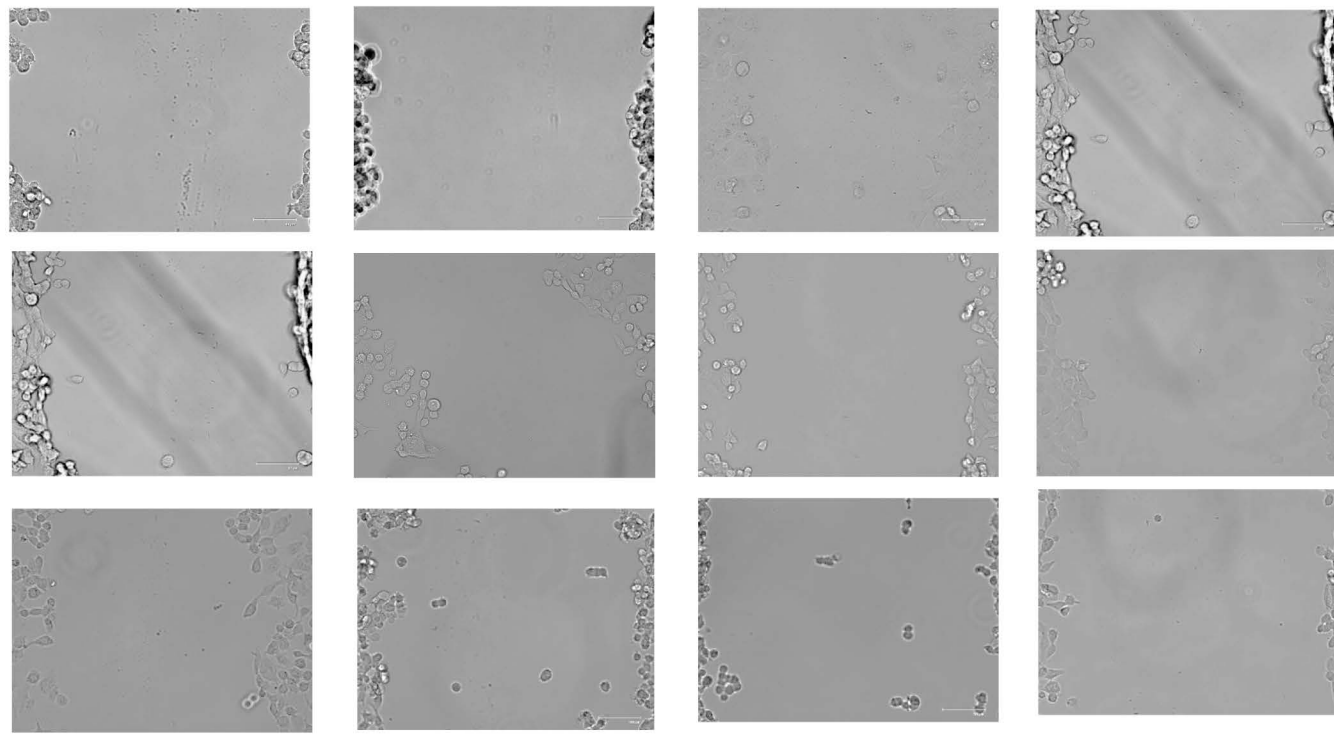

MCF-7M – Time 19 hr

Mock

miR-96 mimic

miR-183 mimic

Negative mimic

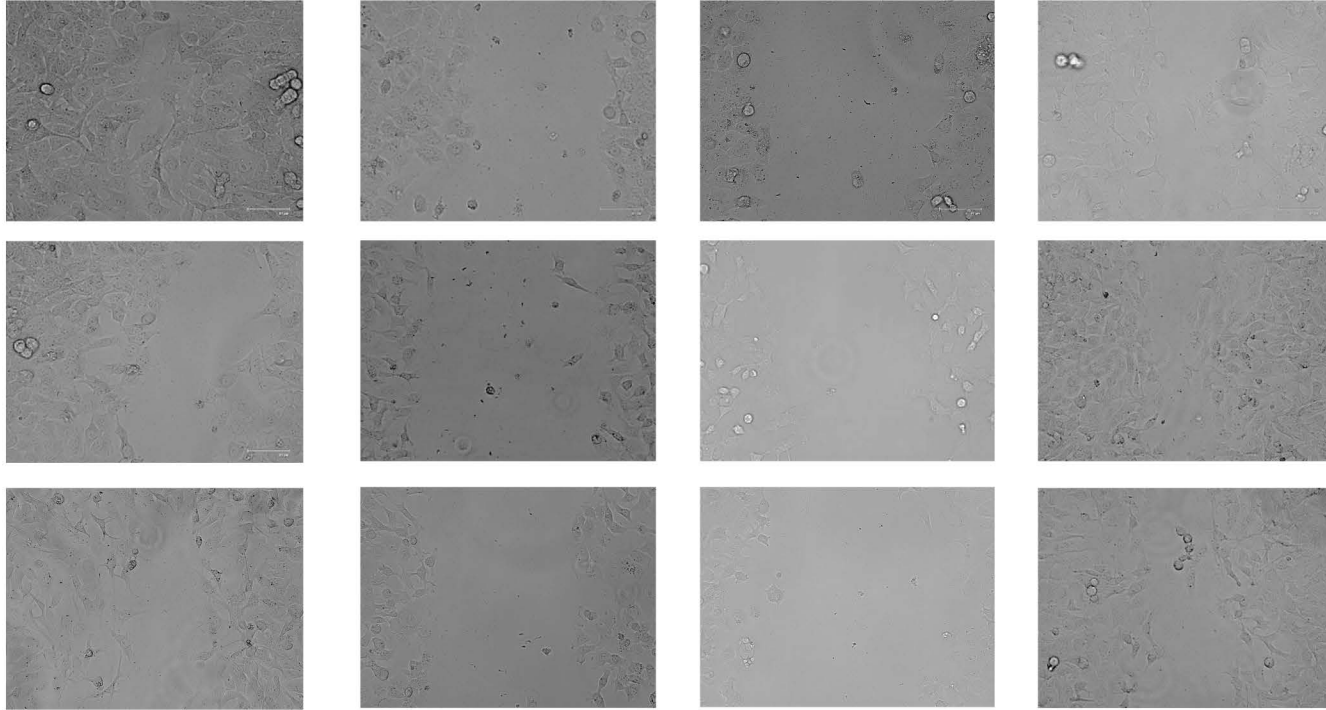

MCF-7 – Time 0

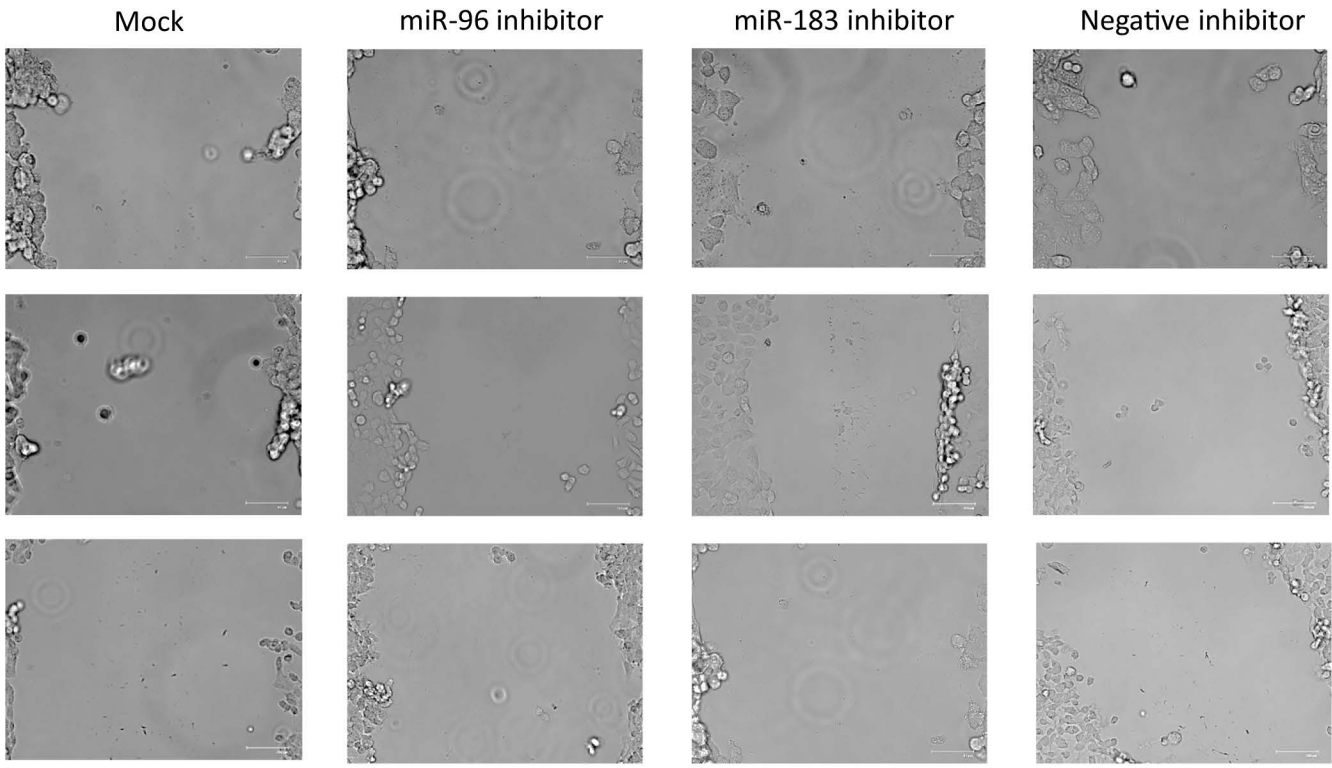

MCF-7 - Time 19 hr

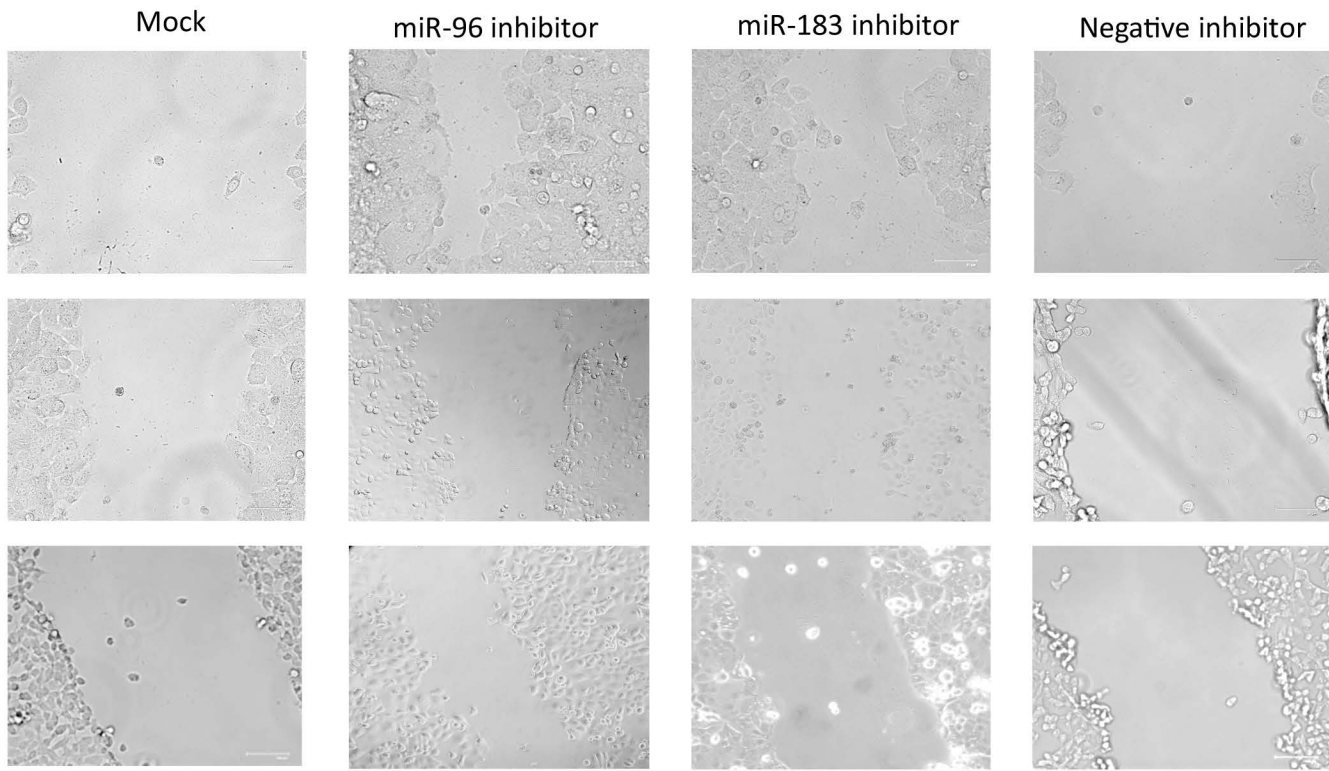

**S8 Data. Wound healing images following transfection with miRNA mimics (MCF-7<sub>M</sub>) or miRNA inhibitors (MCF-7).** Images from three independent experiments (one experiment per row). Data used to quantitate relative wound width (length of wound at 19 hours divided by length of wound at 0 hours). Images presented in Figs 2A and 2B; quantitation presented in Figs 2C and 2D; statistical analysis in S3 Data.
